# Supplementary material
Source: publisher figshare collection journal article supplement (https://tandf.figshare.com/ndownloader/files/15670466)
Supplement: Supplementary file 1 [file 15670466]

**Separation of phenolic compounds from roselle (*Hibiscus sabdariffa*) calyces with aqueous two-phase extraction based on sodium citrate and polyethylene glycol or acetone**

Natalia Rodríguez-Salazar, Salvador Valle-Guadarrama*

**Table S1**. Experimental data corresponding to the binodal curve in system based on sodium citrate (Na3Cit) and polyethylene glycol 2000 (Peg2000) or acetone, obtained with the cloud point method.

| Repetition 1 | | Repetition 2 | | Repetition 3 | | Repetition 1 | | Repetition 2 | | Repetition 3 | |
| --- | --- | --- | --- | --- | --- | --- | --- | --- | --- | --- | --- |
| Na3Cit | Peg2000 | Na3Cit | Peg2000 | Na3Cit | Peg2000 | Na3Cit | Acetone | Na3Cit | Acetone | Na3Cit | Acetone |
| 4.7175 | 33.1331 | 2.6165 | 36.9049 | 3.6483 | 36.3517 | 3.0821 | 44.2724 | 1.3216 | 48.3480 | 3.4536 | 42.0972 |
| 4.8222 | 33.8680 | 2.6482 | 37.3518 | 3.7943 | 34.2291 | 3.4490 | 42.9568 | 2.2531 | 45.5259 | 3.8965 | 40.3743 |
| 4.8979 | 34.4001 | 2.8088 | 36.1086 | 3.9102 | 35.2748 | 4.1966 | 41.2680 | 2.6459 | 43.6053 | 4.3642 | 39.2443 |
| 4.9025 | 32.1134 | 2.9777 | 35.0395 | 3.9561 | 35.6895 | 4.9841 | 39.6411 | 2.6859 | 44.2656 | 4.8273 | 38.1712 |
| 4.9854 | 35.0146 | 3.0077 | 35.3934 | 4.0004 | 33.2555 | 5.9041 | 37.8899 | 3.1432 | 42.3414 | 5.2106 | 37.2339 |
| 5.0286 | 31.0545 | 3.0420 | 35.7962 | 4.0398 | 33.5829 | 6.8249 | 36.1799 | 3.4803 | 40.6207 | 5.6102 | 36.2982 |
| 5.0578 | 31.2351 | 3.0487 | 35.8756 | 4.2160 | 32.3377 | 7.9000 | 34.3729 | 3.5323 | 41.2282 | 6.4923 | 34.8926 |
| 5.0917 | 31.4445 | 3.1690 | 34.4240 | 4.2373 | 34.5848 | 8.9960 | 32.6017 | 4.2079 | 39.2199 | 7.2925 | 33.5371 |
| 5.2069 | 30.4833 | 3.3719 | 33.0350 | 4.2563 | 32.6467 | 10.3922 | 30.5536 | 4.5800 | 38.3020 | 7.6382 | 32.7834 |
| 5.2388 | 30.6699 | 3.4003 | 33.3131 | 4.8571 | 31.7583 | 11.7058 | 28.6715 | 4.9744 | 37.2664 | 8.6436 | 31.2734 |
| 5.4086 | 30.1588 | 3.4388 | 33.6899 | 5.1277 | 30.4879 | 12.8918 | 27.0008 | 5.6960 | 35.9054 | 9.2339 | 30.2438 |
| 5.5394 | 29.5302 | 3.5249 | 31.4377 | 5.1756 | 30.7725 | 14.3530 | 25.0646 | 6.3788 | 34.5918 | 10.1040 | 28.9894 |
| 5.5622 | 29.6517 | 3.5624 | 31.7725 | 5.2274 | 31.0807 | 15.6020 | 23.3964 | 7.0117 | 33.3705 | 10.9593 | 27.7992 |
| 5.6802 | 28.9758 | 3.6077 | 32.3698 | 5.3474 | 29.6862 | 16.7158 | 21.9661 | 7.6585 | 32.3156 | 11.7681 | 26.6477 |
| 5.7170 | 29.1640 | 3.6265 | 29.8090 | 5.3973 | 29.9633 | 18.2662 | 20.0202 | 8.5376 | 30.9574 | 12.9552 | 25.1885 |
| 5.8165 | 28.3184 | 3.7214 | 30.5896 | 5.5475 | 29.1944 | 19.9283 | 18.8125 | 9.3859 | 29.7253 | 13.8907 | 24.0281 |
| 5.8528 | 28.4953 | 3.7554 | 30.8685 | 5.7067 | 28.4697 | 21.4986 | 16.8837 | 10.2342 | 28.4762 | 14.7402 | 22.9920 |
| 5.8781 | 28.6186 | 3.8305 | 29.1087 | 5.7576 | 28.7233 | 22.8984 | 15.3287 | 11.3746 | 27.5822 | 16.2782 | 21.6521 |
| 5.9460 | 27.9600 | 3.8608 | 29.3384 | 5.8841 | 28.0365 | 24.2726 | 13.9191 | 12.3928 | 26.1812 | 17.7838 | 19.9048 |

**Table S1**. Experimental data corresponding to the binodal curve in system based on sodium citrate (Na3Cit) and polyethylene glycol 2000 (Peg2000) or acetone, obtained with the cloud point method (continuation).

| Repetition 1 | | Repetition 2 | | Repetition 3 | | Repetition 1 | | Repetition 2 | | Repetition 3 | |
| --- | --- | --- | --- | --- | --- | --- | --- | --- | --- | --- | --- |
| Na3Cit | Peg2000 | Na3Cit | Peg2000 | Na3Cit | Peg2000 | Na3Cit | Acetone | Na3Cit | Acetone | Na3Cit | Acetone |
| 6.1052 | 27.4926 | 3.9442 | 30.0999 | 6.3362 | 27.6650 | 25.6738 | 12.5749 | 13.4393 | 24.8296 | 18.4789 | 19.1851 |
| 6.1295 | 27.6021 | 4.0336 | 28.6397 | 6.4494 | 27.0134 | 26.8818 | 11.5164 | 14.6715 | 23.2876 | 19.3786 | 18.1283 |
| 6.2389 | 27.0607 | 4.6832 | 27.5955 | 6.5010 | 27.2298 | 27.9444 | 10.6477 | 15.8952 | 21.8053 | 20.1068 | 17.4369 |
| 6.2712 | 27.2007 | 4.7236 | 27.8335 | 6.6155 | 26.6340 | 28.9400 | 9.9031 | 17.3088 | 20.1305 | 20.8599 | 16.7058 |
| 6.3778 | 26.5810 | 4.8737 | 27.1613 | 6.6188 | 25.5983 | 30.2751 | 8.8856 | 18.8965 | 18.2912 | 21.6101 | 15.9839 |
| 6.4179 | 26.7482 | 5.0636 | 26.4784 | 6.6813 | 25.8399 | 31.5055 | 8.0146 | 20.6590 | 16.3407 | 22.3596 | 15.1864 |
| 6.5282 | 26.1085 | 5.1086 | 26.7138 | 6.8007 | 26.2195 | 33.4029 | 6.3713 | 22.2994 | 14.6769 | 23.3031 | 14.2353 |
| 6.5691 | 26.2722 | 5.2310 | 26.0650 | 6.8197 | 25.2148 |  |  | 23.0582 | 13.9388 | 24.1063 | 13.6006 |
| 6.5849 | 25.3183 | 5.3892 | 25.4218 | 6.9731 | 24.8690 |  |  | 23.8057 | 13.2822 | 24.9526 | 12.8965 |
| 6.6309 | 25.4955 | 5.4375 | 25.6498 | 7.4613 | 24.5014 |  |  | 24.7776 | 12.3905 | 25.7174 | 12.3238 |
| 6.7185 | 25.7826 | 5.5639 | 25.0601 | 7.5693 | 23.9667 |  |  | 25.5789 | 11.7331 | 26.6603 | 11.5185 |
| 6.9065 | 24.6476 | 6.0454 | 24.7097 | 7.6287 | 24.1546 |  |  | 26.4888 | 10.9850 | 27.5733 | 10.8047 |
| 6.9419 | 24.7741 | 6.1699 | 24.1197 | 7.7380 | 23.6054 |  |  | 27.4280 | 10.2406 | 28.4055 | 10.2904 |
| 6.9792 | 24.9072 | 6.2180 | 24.3078 | 7.7945 | 23.3600 |  |  | 28.3376 | 9.5792 | 29.3333 | 9.6780 |
| 6.9960 | 24.2148 | 6.2187 | 23.3207 | 7.8294 | 23.0448 |  |  | 29.2292 | 9.0304 | 30.2516 | 9.1069 |
| 7.0383 | 24.3611 | 6.3398 | 23.7749 | 7.9503 | 22.7857 |  |  | 30.1281 | 8.4865 | 31.1366 | 8.5648 |
| 7.1403 | 23.9336 | 6.3617 | 22.9744 | 7.9520 | 22.0530 |  |  | 31.0811 | 7.8849 | 32.0526 | 8.0527 |
| 7.4679 | 23.6949 | 6.4024 | 23.1214 | 8.0684 | 21.8025 |  |  | 32.1981 | 7.1110 | 32.7944 | 7.7125 |
| 7.5633 | 23.3554 | 6.4079 | 22.1794 | 8.1002 | 22.4640 |  |  | 33.7674 | 6.3193 | 34.0500 | 6.8856 |
| 7.5963 | 23.4572 | 6.5142 | 23.4667 | 8.1916 | 21.5196 |  |  | 39.0290 | 0.4279 | 35.0636 | 6.1705 |
| 7.6852 | 23.0398 | 6.5419 | 22.6433 | 8.2157 | 22.1784 |  |  | 39.6522 | 0.4347 |  |  |
| 7.8269 | 22.7618 | 6.5472 | 21.9107 | 8.2854 | 21.2845 |  |  |  |  |  |  |
| 7.9331 | 22.4436 | 6.6957 | 21.6505 | 8.6409 | 21.0459 |  |  |  |  |  |  |

**Table S1**. Experimental data corresponding to the binodal curve in system based on sodium citrate (Na3Cit) and polyethylene glycol 2000 (Peg2000) or acetone, obtained with the cloud point method (continuation).

| Repetition 1 | | Repetition 2 | | Repetition 3 | | Repetition 1 | | Repetition 2 | | Repetition 3 | |
| --- | --- | --- | --- | --- | --- | --- | --- | --- | --- | --- | --- |
| Na3Cit | Peg2000 | Na3Cit | Peg2000 | Na3Cit | Peg2000 | Na3Cit | Acetone | Na3Cit | Acetone | Na3Cit | Acetone |
| 8.0202 | 22.1302 | 6.7237 | 22.3580 | 8.7439 | 20.7873 |  |  |  |  |  |  |
| 8.0535 | 22.2220 | 6.8271 | 21.3560 | 8.8221 | 20.5331 |  |  |  |  |  |  |
| 8.1316 | 21.9301 | 7.1625 | 20.9800 | 8.9256 | 20.3127 |  |  |  |  |  |  |
| 8.4422 | 21.7164 | 7.2073 | 21.1112 | 9.2782 | 20.0822 |  |  |  |  |  |  |
| 8.6644 | 21.1982 | 7.2817 | 20.7190 | 9.3992 | 19.8487 |  |  |  |  |  |  |
| 8.6867 | 21.2527 | 7.4011 | 20.4863 | 9.4224 | 19.1275 |  |  |  |  |  |  |
| 8.7109 | 21.3119 | 7.4530 | 19.9921 | 9.4490 | 19.5018 |  |  |  |  |  |  |
| 8.7265 | 20.8868 | 7.5051 | 20.2474 | 9.5087 | 19.6251 |  |  |  |  |  |  |
| 8.7364 | 21.3744 | 7.5320 | 19.1180 | 9.5379 | 18.8872 |  |  |  |  |  |  |
| 8.7698 | 20.9906 | 7.5585 | 19.7784 | 9.5450 | 19.3112 |  |  |  |  |  |  |
| 8.8581 | 20.7012 | 7.6068 | 18.8059 | 9.6386 | 18.2655 |  |  |  |  |  |  |
| 9.2052 | 20.1870 | 7.6530 | 18.9201 | 9.6568 | 18.6495 |  |  |  |  |  |  |
| 9.2319 | 20.3455 | 7.7009 | 19.5465 | 9.7385 | 18.4590 |  |  |  |  |  |  |
| 9.2669 | 20.3224 | 7.7170 | 18.6019 | 9.7390 | 18.0650 |  |  |  |  |  |  |
| 9.2943 | 20.2884 | 7.7189 | 18.1936 | 9.8499 | 17.8786 |  |  |  |  |  |  |
| 9.5178 | 19.9820 | 7.8256 | 18.0077 | 9.9328 | 17.3624 |  |  |  |  |  |  |
| 9.5858 | 19.7043 | 7.8432 | 18.3867 | 10.0049 | 17.2039 |  |  |  |  |  |  |
| 9.6266 | 19.7882 | 7.9268 | 17.8391 | 10.1000 | 17.0180 |  |  |  |  |  |  |
| 9.7904 | 19.2616 | 7.9457 | 17.4587 | 10.3773 | 16.8602 |  |  |  |  |  |  |
| 9.8335 | 19.3464 | 7.9806 | 19.2276 | 10.4273 | 16.6287 |  |  |  |  |  |  |
| 9.8920 | 19.0880 | 7.9894 | 17.6441 | 10.4750 | 16.7047 |  |  |  |  |  |  |
| 10.0467 | 18.2682 | 8.0495 | 17.2796 | 10.4923 | 16.2204 |  |  |  |  |  |  |
| 10.0664 | 18.6618 | 8.1428 | 17.1273 | 10.5038 | 16.4781 |  |  |  |  |  |  |

**Table S1**. Experimental data corresponding to the binodal curve in system based on sodium citrate (Na3Cit) and polyethylene glycol 2000 (Peg2000) or acetone, obtained with the cloud point method (continuation).

| Repetition 1 | | Repetition 2 | | Repetition 3 | | Repetition 1 | | Repetition 2 | | Repetition 3 | |
| --- | --- | --- | --- | --- | --- | --- | --- | --- | --- | --- | --- |
| Na3Cit | Peg2000 | Na3Cit | Peg2000 | Na3Cit | Peg2000 | Na3Cit | Acetone | Na3Cit | Acetone | Na3Cit | Acetone |
| 10.0826 | 18.3335 | 8.1597 | 16.7764 | 10.5625 | 16.0872 |  |  |  |  |  |  |
| 10.1097 | 18.7421 | 8.2479 | 16.9457 | 10.5731 | 16.3487 |  |  |  |  |  |  |
| 10.1486 | 18.8141 | 8.2584 | 16.6150 | 10.6802 | 15.6457 |  |  |  |  |  |  |
| 10.1649 | 18.0962 | 8.4629 | 16.3174 | 10.6972 | 15.9119 |  |  |  |  |  |  |
| 10.2344 | 17.8749 | 8.7597 | 16.1638 | 10.7106 | 15.4425 |  |  |  |  |  |  |
| 10.3192 | 17.6590 | 8.8763 | 16.0022 | 10.7552 | 15.7776 |  |  |  |  |  |  |
| 10.3558 | 17.7216 | 8.9910 | 15.8473 | 10.7584 | 15.5114 |  |  |  |  |  |  |
| 10.3570 | 17.3439 | 9.0543 | 15.6194 | 10.7845 | 15.3208 |  |  |  |  |  |  |
| 10.4182 | 17.4463 | 9.0947 | 15.6890 | 10.8053 | 15.5790 |  |  |  |  |  |  |
| 10.4388 | 17.1776 | 9.1510 | 15.4869 | 11.0189 | 15.1979 |  |  |  |  |  |  |
| 10.4510 | 17.5013 | 9.2407 | 15.3496 | 11.0938 | 15.0676 |  |  |  |  |  |  |
| 10.4859 | 17.5598 | 9.3194 | 15.2086 | 11.1629 | 14.9550 |  |  |  |  |  |  |
| 10.5348 | 17.1219 | 9.4099 | 14.8428 | 11.2203 | 14.8184 |  |  |  |  |  |  |
| 10.5570 | 16.9131 | 9.4225 | 15.0628 | 11.4329 | 14.7089 |  |  |  |  |  |  |
| 10.6635 | 16.8520 | 9.5326 | 14.5439 | 11.4872 | 14.5971 |  |  |  |  |  |  |
| 10.7008 | 16.6970 | 9.5756 | 14.6094 | 11.5613 | 14.4850 |  |  |  |  |  |  |
| 10.7436 | 16.5335 | 9.9698 | 14.3352 | 11.5938 | 14.1564 |  |  |  |  |  |  |
| 10.8070 | 16.3241 | 10.0426 | 14.2037 | 11.6207 | 14.3672 |  |  |  |  |  |  |
| 10.8237 | 16.3493 | 10.1376 | 13.8540 | 11.6391 | 14.0477 |  |  |  |  |  |  |
| 10.9716 | 16.1210 | 10.1444 | 14.0739 | 11.6441 | 13.5085 |  |  |  |  |  |  |
| 11.2267 | 15.9793 | 10.2230 | 13.9656 | 11.6659 | 13.7105 |  |  |  |  |  |  |
| 11.2723 | 15.8300 | 10.2355 | 13.7272 | 11.7009 | 13.3896 |  |  |  |  |  |  |
| 11.3626 | 15.6794 | 10.3171 | 13.6111 | 11.7032 | 13.9443 |  |  |  |  |  |  |

**Table S1**. Experimental data corresponding to the binodal curve in system based on sodium citrate (Na3Cit) and polyethylene glycol 2000 (Peg2000) or acetone, obtained with the cloud point method (continuation).

| Repetition 1 | | Repetition 2 | | Repetition 3 | | Repetition 1 | | Repetition 2 | | Repetition 3 | |
| --- | --- | --- | --- | --- | --- | --- | --- | --- | --- | --- | --- |
| Na3Cit | Peg2000 | Na3Cit | Peg2000 | Na3Cit | Peg2000 | Na3Cit | Acetone | Na3Cit | Acetone | Na3Cit | Acetone |
| 11.4460 | 15.5128 | 10.3217 | 13.3795 | 11.7790 | 13.8277 |  |  |  |  |  |  |
| 11.5126 | 15.3395 | 10.3769 | 13.4957 | 11.9000 | 13.2953 |  |  |  |  |  |  |
| 11.5773 | 15.1972 | 10.3878 | 13.2796 | 11.9831 | 13.0999 |  |  |  |  |  |  |
| 11.6477 | 15.0422 | 10.4611 | 13.1787 | 12.0359 | 13.0068 |  |  |  |  |  |  |
| 11.7078 | 14.8954 | 10.4872 | 12.8862 | 12.2428 | 12.9106 |  |  |  |  |  |  |
| 11.8155 | 14.8387 | 10.4908 | 13.0266 | 12.3188 | 12.7976 |  |  |  |  |  |  |
| 11.8726 | 14.6945 | 10.5604 | 12.7842 | 12.3689 | 12.7062 |  |  |  |  |  |  |
| 11.9204 | 14.5466 | 10.6389 | 12.6877 | 12.4164 | 12.6133 |  |  |  |  |  |  |
| 11.9757 | 14.4052 | 10.8705 | 12.5876 | 12.6165 | 12.5218 |  |  |  |  |  |  |
| 12.0422 | 14.2639 | 10.9250 | 12.4660 | 12.6607 | 12.4328 |  |  |  |  |  |  |
| 12.0876 | 14.1329 | 10.9787 | 12.3735 | 12.7088 | 12.3334 |  |  |  |  |  |  |
| 12.2114 | 13.9484 | 11.0335 | 12.2836 | 12.7467 | 12.2555 |  |  |  |  |  |  |
| 12.2805 | 13.8595 | 11.2836 | 12.1776 | 12.9138 | 12.1803 |  |  |  |  |  |  |
| 12.3409 | 13.7120 | 11.3369 | 12.0927 | 12.9438 | 11.8323 |  |  |  |  |  |  |
| 12.3707 | 13.5928 | 11.3954 | 12.0086 | 12.9537 | 12.0897 |  |  |  |  |  |  |
| 12.5170 | 13.4264 | 11.4337 | 11.7729 | 13.0117 | 11.6684 |  |  |  |  |  |  |
| 12.5823 | 13.2984 | 11.4483 | 11.5410 | 13.0613 | 11.7128 |  |  |  |  |  |  |
| 12.6145 | 13.2026 | 11.4826 | 11.6975 | 13.0839 | 11.9604 |  |  |  |  |  |  |
| 12.6601 | 13.1016 | 11.5053 | 11.8539 | 13.1213 | 11.8725 |  |  |  |  |  |  |
| 12.8858 | 12.9935 | 11.5417 | 11.6168 | 19.1382 | 2.9008 |  |  |  |  |  |  |
| 13.1206 | 12.8809 | 13.3798 | 12.3898 | 19.3209 | 2.7611 |  |  |  |  |  |  |
| 13.1447 | 12.6307 | 13.6968 | 11.8635 | 19.5024 | 2.6014 |  |  |  |  |  |  |
| 13.1690 | 12.7928 | 13.8072 | 10.7447 | 19.6823 | 2.4474 |  |  |  |  |  |  |

**Table S1**. Experimental data corresponding to the binodal curve in system based on sodium citrate (Na3Cit) and polyethylene glycol 2000 (Peg2000) or acetone, obtained with the cloud point method (continuation).

| Repetition 1 | | Repetition 2 | | Repetition 3 | | Repetition 1 | | Repetition 2 | | Repetition 3 | |
| --- | --- | --- | --- | --- | --- | --- | --- | --- | --- | --- | --- |
| Na3Cit | Peg2000 | Na3Cit | Peg2000 | Na3Cit | Peg2000 | Na3Cit | Acetone | Na3Cit | Acetone | Na3Cit | Acetone |
| 13.2084 | 12.6919 | 14.0621 | 11.3463 | 19.8702 | 2.2965 |  |  |  |  |  |  |
| 13.2979 | 12.4825 | 14.1481 | 10.1625 | 20.2413 | 1.9774 |  |  |  |  |  |  |
| 13.3434 | 12.3849 | 14.4303 | 9.5673 | 20.3478 | 1.9879 |  |  |  |  |  |  |
| 13.3520 | 12.5332 | 14.7198 | 9.0962 | 20.4981 | 1.7911 |  |  |  |  |  |  |
| 13.3805 | 12.2909 | 15.1031 | 8.5938 | 20.7933 | 1.6120 |  |  |  |  |  |  |
| 13.4254 | 12.1871 | 15.4331 | 8.0558 | 20.9148 | 1.6214 |  |  |  |  |  |  |
| 13.5394 | 12.0454 | 15.7828 | 7.4992 | 21.1576 | 1.4251 |  |  |  |  |  |  |
| 13.5595 | 11.9472 | 16.0798 | 7.0457 | 21.2815 | 1.4334 |  |  |  |  |  |  |
| 13.6718 | 11.8211 | 16.3891 | 6.5703 | 21.5631 | 1.1443 |  |  |  |  |  |  |
| 13.7058 | 11.7316 | 16.7162 | 6.1011 | 21.6997 | 1.1515 |  |  |  |  |  |  |
| 13.7355 | 11.6443 | 16.9798 | 5.7437 | 21.9262 | 0.9674 |  |  |  |  |  |  |
| 13.7704 | 11.5524 | 17.2560 | 5.3742 | 22.0801 | 0.9741 |  |  |  |  |  |  |
| 13.8023 | 11.2886 | 17.8461 | 4.6018 | 22.2024 | 0.9795 |  |  |  |  |  |  |
| 13.8549 | 11.1127 | 18.0883 | 4.3224 | 22.4465 | 0.8002 |  |  |  |  |  |  |
| 13.8611 | 11.4282 | 18.3252 | 4.0318 | 22.5800 | 0.8049 |  |  |  |  |  |  |
| 13.9002 | 10.4098 | 18.5720 | 3.7545 | 22.8171 | 0.8134 |  |  |  |  |  |  |
| 13.9014 | 11.1501 | 18.8477 | 3.4791 | 22.9293 | 0.8174 |  |  |  |  |  |  |
| 14.1922 | 9.9086 | 19.0281 | 3.3395 | 23.0554 | 0.8219 |  |  |  |  |  |  |
| 14.5980 | 9.1964 | 19.2900 | 3.0426 | 23.2035 | 0.8272 |  |  |  |  |  |  |
| 15.0231 | 8.4737 | 19.4570 | 2.9070 | 23.3601 | 0.8327 |  |  |  |  |  |  |
| 15.3917 | 7.8560 | 19.6272 | 2.7912 | 23.5067 | 0.8380 |  |  |  |  |  |  |
| 15.6899 | 7.2333 | 19.8154 | 2.6495 | 23.7907 | 0.6288 |  |  |  |  |  |  |
| 16.0090 | 6.7372 | 20.0165 | 2.5038 | 23.9414 | 0.6328 |  |  |  |  |  |  |

**Table S1**. Experimental data corresponding to the binodal curve in system based on sodium citrate (Na3Cit) and polyethylene glycol 2000 (Peg2000) or acetone, obtained with the cloud point method (continuation).

| Repetition 1 | | Repetition 2 | | Repetition 3 | | Repetition 1 | | Repetition 2 | | Repetition 3 | |
| --- | --- | --- | --- | --- | --- | --- | --- | --- | --- | --- | --- |
| Na3Cit | Peg2000 | Na3Cit | Peg2000 | Na3Cit | Peg2000 | Na3Cit | Acetone | Na3Cit | Acetone | Na3Cit | Acetone |
| 16.2798 | 6.3266 | 20.2204 | 2.3452 | 24.0961 | 0.6369 |  |  |  |  |  |  |
| 16.5664 | 5.8927 | 20.4089 | 2.2221 | 24.2421 | 0.6407 |  |  |  |  |  |  |
| 16.8353 | 5.5378 | 20.6150 | 2.0409 | 24.3818 | 0.6444 |  |  |  |  |  |  |
| 17.1480 | 5.0837 | 20.8308 | 1.8681 | 24.5354 | 0.6485 |  |  |  |  |  |  |
| 17.4119 | 4.7460 | 20.9307 | 1.8771 | 24.8153 | 0.4307 |  |  |  |  |  |  |
| 17.6948 | 4.3730 | 21.1692 | 1.6820 | 24.9736 | 0.4334 |  |  |  |  |  |  |
| 17.9009 | 4.1327 | 21.2897 | 1.6915 | 25.1412 | 0.4363 |  |  |  |  |  |  |
| 18.1227 | 3.8726 | 21.4857 | 1.5180 | 25.2895 | 0.4389 |  |  |  |  |  |  |
| 18.5871 | 3.3231 | 21.5895 | 1.5254 | 25.4337 | 0.4414 |  |  |  |  |  |  |
| 18.8380 | 3.0690 | 21.8207 | 1.3497 | 25.6050 | 0.4444 |  |  |  |  |  |  |
| 18.9449 | 3.0864 | 21.9369 | 1.3569 | 25.7720 | 0.4473 |  |  |  |  |  |  |
| 19.2384 | 2.7311 | 22.1762 | 1.1674 | 25.9564 | 0.4505 |  |  |  |  |  |  |
| 19.4105 | 2.5922 | 22.3054 | 1.1742 | 26.6276 | 0.2349 |  |  |  |  |  |  |
| 19.5859 | 2.4507 | 22.4237 | 1.1804 | 26.8125 | 0.2365 |  |  |  |  |  |  |
| 19.7570 | 2.3395 | 22.8234 | 1.0057 | 26.9943 | 0.2381 |  |  |  |  |  |  |
| 19.9291 | 2.2034 | 22.9519 | 1.0113 | 27.1542 | 0.2395 |  |  |  |  |  |  |
| 20.1049 | 2.0818 | 23.0815 | 1.0170 | 27.5182 | 0.2427 |  |  |  |  |  |  |
| 20.1941 | 2.0910 | 23.3615 | 0.8327 | 27.7066 | 0.2444 |  |  |  |  |  |  |
| 20.4862 | 1.7912 | 23.5271 | 0.8386 | 27.9047 | 0.2461 |  |  |  |  |  |  |
| 20.5966 | 1.8008 | 23.6897 | 0.8444 | 28.1101 | 0.2479 |  |  |  |  |  |  |
| 20.8046 | 1.6526 | 23.8602 | 0.8505 | 28.3358 | 0.2499 |  |  |  |  |  |  |
| 20.9318 | 1.6627 | 24.1260 | 0.6377 | 28.5599 | 0.2519 |  |  |  |  |  |  |
| 21.0440 | 1.6716 | 24.2743 | 0.6416 | 28.7879 | 0.2539 |  |  |  |  |  |  |

**Table S1**. Experimental data corresponding to the binodal curve in system based on sodium citrate (Na3Cit) and polyethylene glycol 2000 (Peg2000) or acetone, obtained with the cloud point method (continuation).

| Repetition 1 | | Repetition 2 | | Repetition 3 | | Repetition 1 | | Repetition 2 | | Repetition 3 | |
| --- | --- | --- | --- | --- | --- | --- | --- | --- | --- | --- | --- |
| Na3Cit | Peg2000 | Na3Cit | Peg2000 | Na3Cit | Peg2000 | Na3Cit | Acetone | Na3Cit | Acetone | Na3Cit | Acetone |
| 21.1317 | 1.5119 | 24.4304 | 0.6457 | 29.0689 | 0.2564 |  |  |  |  |  |  |
| 21.3575 | 1.3513 | 24.5644 | 0.6493 | 29.2887 | 0.2583 |  |  |  |  |  |  |
| 21.4746 | 1.3587 | 24.7119 | 0.6532 | 29.4919 | 0.2601 |  |  |  |  |  |  |
| 21.7014 | 1.2044 | 24.8597 | 0.6571 | 29.7214 | 0.2622 |  |  |  |  |  |  |
| 21.8225 | 1.2111 | 25.3434 | 0.4215 | 29.9567 | 0.2642 |  |  |  |  |  |  |
| 22.0432 | 1.0428 | 25.5226 | 0.4245 | 30.1979 | 0.2664 |  |  |  |  |  |  |
| 22.1632 | 1.0484 | 25.6851 | 0.4272 | 30.4404 | 0.2685 |  |  |  |  |  |  |
| 22.3596 | 0.8911 | 25.8665 | 0.4302 | 30.6775 | 0.2706 |  |  |  |  |  |  |
| 22.5055 | 0.8969 | 26.0188 | 0.4328 | 30.9130 | 0.2727 |  |  |  |  |  |  |
| 22.6361 | 0.9021 | 26.1988 | 0.4358 | 31.1845 | 0.2751 |  |  |  |  |  |  |
| 22.7800 | 0.9079 | 26.4302 | 0.4396 | 31.4408 | 0.2773 |  |  |  |  |  |  |
| 23.0540 | 0.7407 | 26.6024 | 0.4425 | 31.6895 | 0.2795 |  |  |  |  |  |  |
| 23.1889 | 0.7450 | 26.7446 | 0.4448 | 31.9351 | 0.2817 |  |  |  |  |  |  |
| 23.3228 | 0.7493 | 27.3829 | 0.2088 | 32.1888 | 0.2839 |  |  |  |  |  |  |
| 23.5745 | 0.5749 | 27.5862 | 0.2104 | 32.4657 | 0.2864 |  |  |  |  |  |  |
| 23.7326 | 0.5788 | 27.8119 | 0.2121 | 32.7402 | 0.2888 |  |  |  |  |  |  |
| 23.8651 | 0.5820 | 28.0089 | 0.2136 | 33.0264 | 0.2913 |  |  |  |  |  |  |
| 24.0141 | 0.5856 | 28.2062 | 0.2151 | 33.3184 | 0.2939 |  |  |  |  |  |  |
| 24.1554 | 0.5891 | 28.4919 | 0.2173 | 33.5897 | 0.2963 |  |  |  |  |  |  |
| 24.4275 | 0.4101 | 28.7000 | 0.2189 | 33.9101 | 0.2991 |  |  |  |  |  |  |
| 24.5874 | 0.4128 | 28.9178 | 0.2205 | 34.2111 | 0.3018 |  |  |  |  |  |  |
| 24.7404 | 0.4154 | 29.1382 | 0.2222 | 34.5317 | 0.3046 |  |  |  |  |  |  |
| 24.8929 | 0.4179 | 29.3095 | 0.2235 | 34.8617 | 0.3075 |  |  |  |  |  |  |

**Table S1**. Experimental data corresponding to the binodal curve in system based on sodium citrate (Na3Cit) and polyethylene glycol 2000 (Peg2000) or acetone, obtained with the cloud point method (continuation).

| Repetition 1 | | Repetition 2 | | Repetition 3 | | Repetition 1 | | Repetition 2 | | Repetition 3 | |
| --- | --- | --- | --- | --- | --- | --- | --- | --- | --- | --- | --- |
| Na3Cit | Peg2000 | Na3Cit | Peg2000 | Na3Cit | Peg2000 | Na3Cit | Acetone | Na3Cit | Acetone | Na3Cit | Acetone |
| 25.0480 | 0.4206 | 29.5298 | 0.2252 | 35.2060 | 0.3105 |  |  |  |  |  |  |
| 25.2241 | 0.4235 | 29.7316 | 0.2268 | 35.5401 | 0.3135 |  |  |  |  |  |  |
| 25.3956 | 0.4264 | 29.9612 | 0.2285 | 36.4696 | 0.3217 |  |  |  |  |  |  |
| 25.5520 | 0.4290 | 30.1791 | 0.2302 | 36.8104 | 0.3247 |  |  |  |  |  |  |
| 25.7216 | 0.4319 | 30.3973 | 0.2318 | 37.2352 | 0.3284 |  |  |  |  |  |  |
| 25.8867 | 0.4346 | 30.6547 | 0.2338 | 37.6361 | 0.3320 |  |  |  |  |  |  |
| 26.0559 | 0.4375 | 30.8851 | 0.2355 | 37.9918 | 0.3351 |  |  |  |  |  |  |
| 26.2270 | 0.4403 | 31.1571 | 0.2376 | 38.4116 | 0.3388 |  |  |  |  |  |  |
| 26.4328 | 0.4438 | 31.4226 | 0.2396 | 38.8144 | 0.3424 |  |  |  |  |  |  |
| 26.6246 | 0.4470 | 31.6453 | 0.2413 | 39.2392 | 0.3461 |  |  |  |  |  |  |
| 26.8166 | 0.4502 | 31.8707 | 0.2431 | 39.6503 | 0.3497 |  |  |  |  |  |  |
| 27.0453 | 0.4541 | 32.1567 | 0.2452 | 42.1821 | 0.3721 |  |  |  |  |  |  |
| 27.2360 | 0.4573 | 32.4333 | 0.2474 |  |  |  |  |  |  |  |  |
| 27.4360 | 0.4606 | 32.7257 | 0.2496 |  |  |  |  |  |  |  |  |
| 27.6458 | 0.4642 | 33.0420 | 0.2520 |  |  |  |  |  |  |  |  |
| 27.8392 | 0.4674 | 33.4397 | 0.2550 |  |  |  |  |  |  |  |  |
| 28.0476 | 0.4709 | 33.6979 | 0.2570 |  |  |  |  |  |  |  |  |
| 28.2382 | 0.4741 | 33.9857 | 0.2592 |  |  |  |  |  |  |  |  |
| 28.4478 | 0.4776 | 34.2841 | 0.2615 |  |  |  |  |  |  |  |  |
| 28.6297 | 0.4807 | 34.6115 | 0.2640 |  |  |  |  |  |  |  |  |
| 28.8257 | 0.4840 | 34.9456 | 0.2665 |  |  |  |  |  |  |  |  |
| 29.0506 | 0.4878 | 35.3308 | 0.2695 |  |  |  |  |  |  |  |  |
| 29.2676 | 0.4914 | 35.6983 | 0.2723 |  |  |  |  |  |  |  |  |

**Table S1**. Experimental data corresponding to the binodal curve in system based on sodium citrate (Na3Cit) and polyethylene glycol 2000 (Peg2000) or acetone, obtained with the cloud point method (continuation).

| Repetition 1 | | Repetition 2 | | Repetition 3 | | Repetition 1 | | Repetition 2 | | Repetition 3 | |
| --- | --- | --- | --- | --- | --- | --- | --- | --- | --- | --- | --- |
| Na3Cit | Peg2000 | Na3Cit | Peg2000 | Na3Cit | Peg2000 | Na3Cit | Acetone | Na3Cit | Acetone | Na3Cit | Acetone |
| 29.4886 | 0.4951 | 36.0673 | 0.2751 |  |  |  |  |  |  |  |  |
| 29.7105 | 0.4988 | 36.4324 | 0.2779 |  |  |  |  |  |  |  |  |
| 29.9566 | 0.5030 | 36.7401 | 0.2802 |  |  |  |  |  |  |  |  |
| 30.2014 | 0.5071 | 37.0444 | 0.2825 |  |  |  |  |  |  |  |  |
| 30.4286 | 0.5109 | 37.3931 | 0.2852 |  |  |  |  |  |  |  |  |
| 30.6975 | 0.5154 | 37.7546 | 0.2879 |  |  |  |  |  |  |  |  |
| 30.9523 | 0.5197 | 38.1520 | 0.2910 |  |  |  |  |  |  |  |  |
| 31.1979 | 0.5238 | 38.5566 | 0.2941 |  |  |  |  |  |  |  |  |
| 31.5303 | 0.5294 | 38.9399 | 0.2970 |  |  |  |  |  |  |  |  |
| 31.8613 | 0.5349 | 39.3358 | 0.3000 |  |  |  |  |  |  |  |  |
| 32.1216 | 0.5393 | 39.6972 | 0.3028 |  |  |  |  |  |  |  |  |
| 32.3842 | 0.5437 |  |  |  |  |  |  |  |  |  |  |
| 32.6623 | 0.5484 |  |  |  |  |  |  |  |  |  |  |
| 32.9181 | 0.5527 |  |  |  |  |  |  |  |  |  |  |
| 33.2174 | 0.5577 |  |  |  |  |  |  |  |  |  |  |
| 33.5268 | 0.5629 |  |  |  |  |  |  |  |  |  |  |
| 33.9639 | 0.5702 |  |  |  |  |  |  |  |  |  |  |
| 34.2458 | 0.5750 |  |  |  |  |  |  |  |  |  |  |
| 34.5868 | 0.5807 |  |  |  |  |  |  |  |  |  |  |
| 34.9790 | 0.5873 |  |  |  |  |  |  |  |  |  |  |
| 35.3691 | 0.5938 |  |  |  |  |  |  |  |  |  |  |
| 35.6944 | 0.5993 |  |  |  |  |  |  |  |  |  |  |
| 36.0435 | 0.6052 |  |  |  |  |  |  |  |  |  |  |

**Table S1**. Experimental data corresponding to the binodal curve in system based on sodium citrate (Na3Cit) and polyethylene glycol 2000 (Peg2000) or acetone, obtained with the cloud point method (continuation).

| Repetition 1 | | Repetition 2 | | Repetition 3 | | Repetition 1 | | Repetition 2 | | Repetition 3 | |
| --- | --- | --- | --- | --- | --- | --- | --- | --- | --- | --- | --- |
| Na3Cit | Peg2000 | Na3Cit | Peg2000 | Na3Cit | Peg2000 | Na3Cit | Acetone | Na3Cit | Acetone | Na3Cit | Acetone |
| 36.3862 | 0.6109 |  |  |  |  |  |  |  |  |  |  |
| 36.7316 | 0.6167 |  |  |  |  |  |  |  |  |  |  |
| 37.1092 | 0.6231 |  |  |  |  |  |  |  |  |  |  |
| 37.4550 | 0.6289 |  |  |  |  |  |  |  |  |  |  |
| 37.8413 | 0.6353 |  |  |  |  |  |  |  |  |  |  |
| 38.2198 | 0.6417 |  |  |  |  |  |  |  |  |  |  |
| 38.5609 | 0.6474 |  |  |  |  |  |  |  |  |  |  |
| 38.9741 | 0.6544 |  |  |  |  |  |  |  |  |  |  |
| 39.3395 | 0.6605 |  |  |  |  |  |  |  |  |  |  |
| 39.6527 | 0.3473 |  |  |  |  |  |  |  |  |  |  |
